# Supplementary material for: Obtaining a broadband magneto-mechano-electric generator with large power for IoT operation
Source: Royal Society of Chemistry journal article supplement (doi:10.1039/d3ta01587d), 2023-01-01
Supplement: d3ta01587d3.pdf [file d3ta01587d3.pdf]

## **Obtaining a Broadband Magneto-mechano-electric generator with large power for IoT operation**

Deepak R. Patil<sup>a</sup>, Seungah Lee<sup>a</sup>, Atul Thakre<sup>b</sup>, Ajeet Kumar<sup>a</sup>, Dae-Yong Jeong<sup>c\*</sup>, Jungho Ryu<sup>ad\*</sup>

*<sup>a</sup>School of Materials Science and Engineering, Yeungnam University, Gyeongsan 38541, Korea*

*<sup>b</sup>Centre for Functional Materials, Vellore Institute of Technology, Vellore 632014, Tamilnadu, India*

*<sup>c</sup>Department of Materials Science & Engineering, Inha University, Incheon, 22212, Korea*

*<sup>d</sup>Institute of Materials Technology, Yeungnam University, Daehak-ro, Gyeongsan, 38541, Korea.*

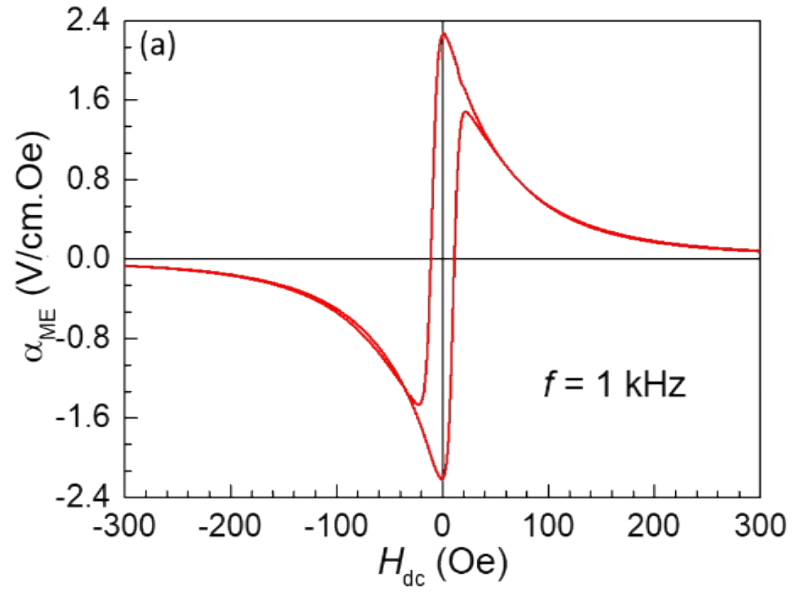

**Figure S1** Magnetolectric voltage coefficient ( $\alpha_{ME}$ ) as a function of DC magnetic field for MME generators at 1 kHz ac magnetic field.

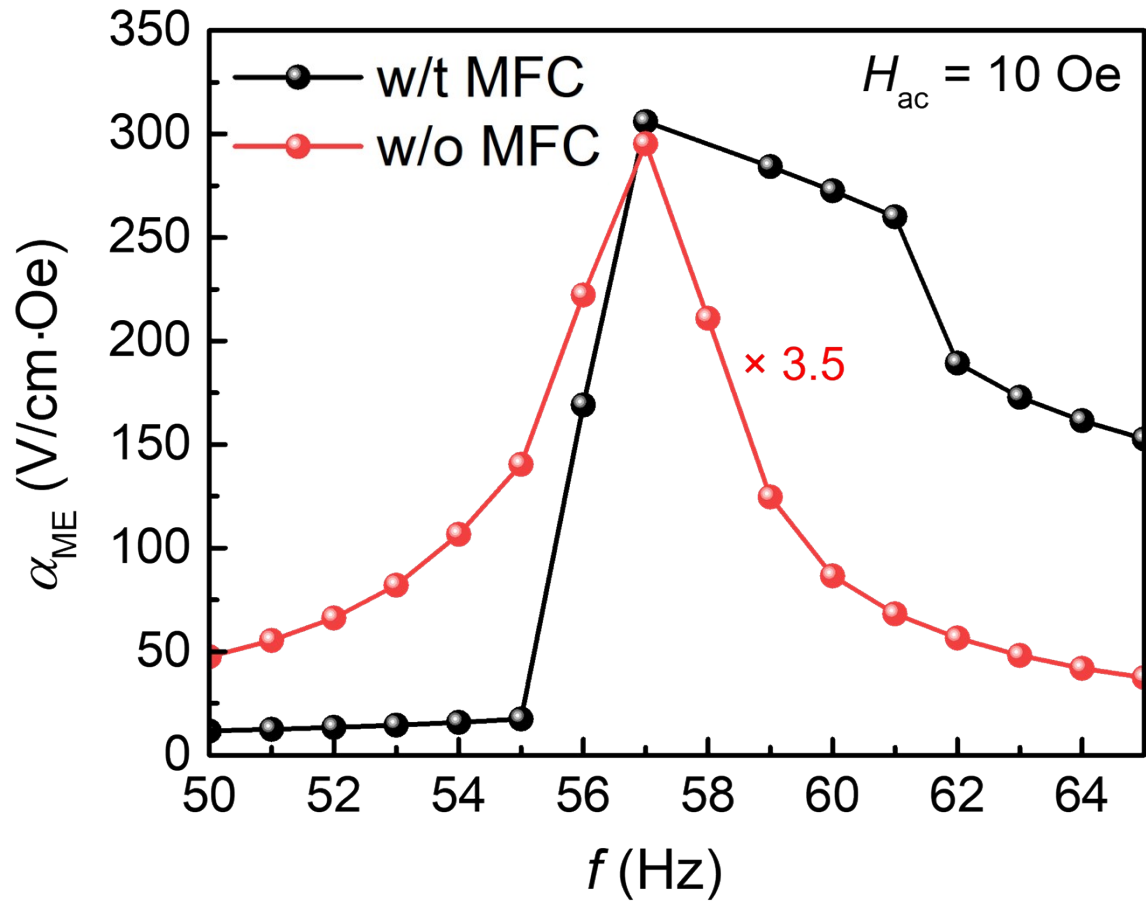

**Figure S2:** ME voltage coefficient as a function of frequency for MME generator with and without Ferrite MFC under AC magnetic field of 10Oe.

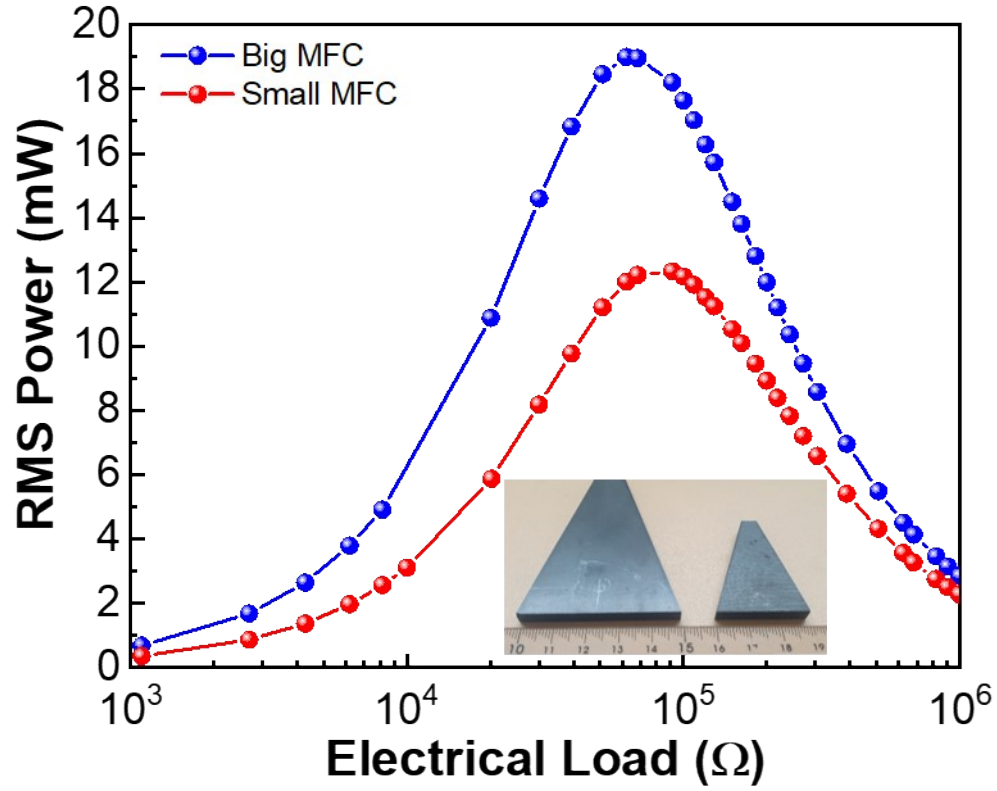

**Figure S3:** Output RMS power of Type II MME generator with small and big size MFC at various load resistances. With decreasing MFC size the output power was decreased but still sufficient to operate the IoT sensor with data communication system.

**Table S1:** Operating current of the temperature and humidity IoT sensor used in the present study under different operating modes.

| Component                 | Power consumption                                                                                  |
|---------------------------|----------------------------------------------------------------------------------------------------|
| IST3055 MCU               | <0.5 $\mu$ A (standby mode, @ 1.8-5.5V supply)<br><600 $\mu$ A (measuring mode, @ 1.8-5.5V supply) |
| TLSR8251 bluetooth module | 5.3 mA (RX/TX mode, @1.8-3.6V supply)<br>1 $\mu$ A (standby mode, @1.8-3.6V supply)                |
| SHTV3 sensor IC           | 4.8@2.4 supply, 1 measurement/s)                                                                   |
